# Supplementary material for: Synergetic formation of secondary inorganic and organic aerosol: Influence of SO 2 and/or NH 3 in the heterogeneous process
Source: Copernicus journal article supplement (doi:10.5194/acp-2016-486), 2016-06-14
Supplement: Supplementary file 1 [file acp-2016-486-supplement.pdf]

**Synergetic formation of secondary inorganic and organic  
aerosol: Influence of SO<sub>2</sub> and/or NH<sub>3</sub> in the heterogeneous  
process**

**(Supporting information)**

**Biwu Chu<sup>a, b</sup>, Xiao Zhang<sup>c, d</sup>, Yongchun Liu<sup>a, b</sup>, Hong He<sup>a, b, \*</sup>, Yele Sun<sup>b, e</sup>, Jingkun Jiang<sup>c</sup>, Junhua Li<sup>c</sup>, Jiming Hao<sup>c</sup>**

<sup>a</sup> State Key Joint Laboratory of Environment Simulation and Pollution Control, Research Center for Eco-Environmental Sciences, Chinese Academy of Sciences, Beijing 100085, China

<sup>b</sup> Center for Excellence in Urban Atmospheric Environment, Institute of Urban Environment, Chinese Academy of Sciences, Xiamen 361021, China

<sup>c</sup> State Key Joint Laboratory of Environment Simulation and Pollution Control, School of Environment, Tsinghua University, Beijing 100084, China

<sup>d</sup> Nanjing University of Information Science & Technology, Nanjing 210044, China

<sup>e</sup> State Key Laboratory of Atmospheric Boundary Layer Physics and Atmospheric Chemistry, Institute of Atmospheric Physics, Chinese Academy of Sciences, Beijing 100029, China

*Correspondence to:* Hong He (honghe@rcees.ac.cn)

## Increase of secondary aerosol formation with SO<sub>2</sub> consumption, particle surface area, and particle volume

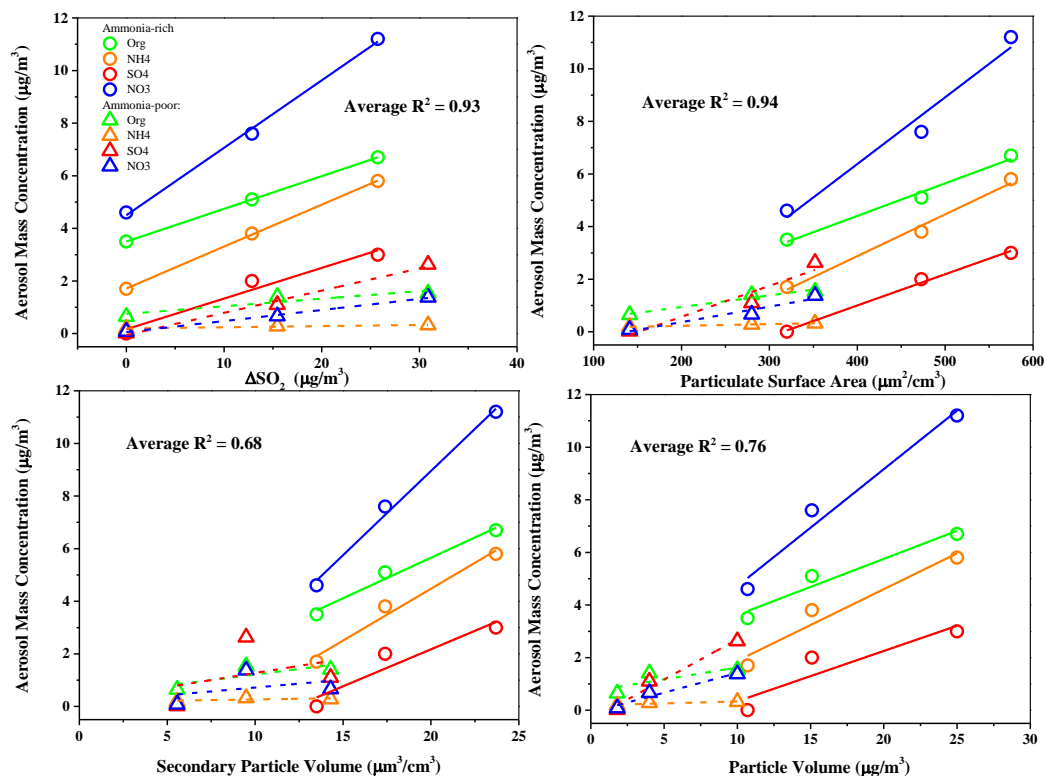

Fig. S1 Correlation of secondary aerosol formation with SO<sub>2</sub> consumption, particle surface area, and particle volume.

## Estimating concentrations of nitrogen-containing organics (NOC)

Nitrogen-containing organics (NOC) might contain organonitrates, organic ammonium salts, and species with carbon covalently bonded to nitrogen. Organonitrates could be estimated using methods suggested by Farmer et al. (2010), one of which was using NO<sub>x</sub><sup>+</sup> ratios. The ratio of m/z 30 to m/z 46 for nitrate ( $R_{\text{NH}_4\text{NO}_3}$ ) is lower than that of organonitrates ( $R_{\text{Organonitrates}}$ ) in AMS measurement, so the observed ratio,  $R_{\text{Obs}}$ , can be used to estimate the fraction of the total nitrate signal due to organonitrates ( $x$ )

using the Equation S1:

$$x = \frac{(R_{obs} - R_{NH_4NO_3})(1 + R_{obs})}{(R_{Organonitrates} - R_{NH_4NO_3})(1 + R_{Organonitrates})} \quad (S1)$$

where  $R_{NH_4NO_3}$  was measured as 2.35 in the calibration of AMS, and  $R_{Organonitrates}$  was assumed to be 15, which was highest value suggested by Farmer et al (2010), to avoid overestimation of organonitrates. The estimated concentrations of organonitrates are shown in Fig. S2.

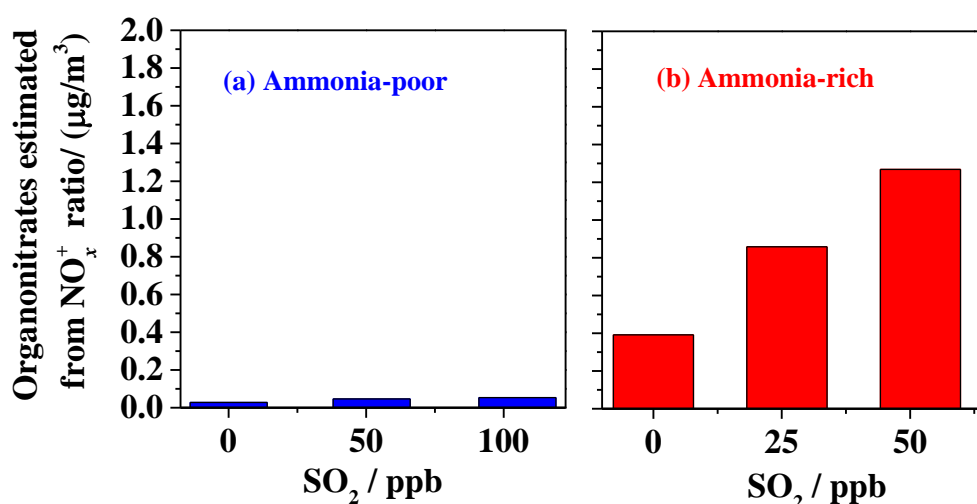

Fig. S2 The estimated concentrations of organonitrates from NO<sub>x</sub><sup>+</sup> ratios as a function of SO<sub>2</sub> concentration in photooxidation of toluene/NO<sub>x</sub> under (a) NH<sub>3</sub>-poor and (b) NH<sub>3</sub>-rich conditions

As suggested by Farmer et al. (2010), NH<sub>4</sub><sup>+</sup> is required to balance with the SO<sub>4</sub><sup>2-</sup> and NO<sub>3</sub><sup>-</sup> in the absence of NOC. In this study, the measured concentration of NH<sub>4</sub><sup>+</sup> was higher than the calculated concentration according to charge balance, especially in the NH<sub>3</sub>-rich experiments. This result indicated the presence of NOC with reduced N (Reduced NOC). The NH<sub>3</sub> present may react with the ring opening oxycarboxylic acids from

toluene (Jang and Kamens, 2001) and carbonyl functional group organics (Wang et al., 2010), and result in organic ammonium salt products, imines, imidazole, and so on. The  $\text{NH}_4$  balance considering the presence of NOC with reduced N is described by Equation S2:

$$\frac{c_{\text{NH}_4}}{18} - \frac{c_{\text{Reduced NOC}}}{M_{\text{Reduced NOC}}} = 2 \times \frac{c_{\text{SO}_4}}{96} + \left[ \frac{c_{\text{NO}_3}}{62} - \frac{c_{\text{Organonitrates}}}{M_{\text{Organonitrates}}} \right] \quad (\text{S2})$$

where  $c_{\text{NH}_4}$ ,  $c_{\text{SO}_4}$  and  $c_{\text{NO}_3}$  are the mass concentrations of ammonium and sulfate and nitrate in AMS measurement results, respectively; while  $c_{\text{Reduced NOC}}$  and  $c_{\text{Organonitrates}}$  are the estimated mass concentrations of NOC with reduced N and organonitrates, respectively.  $M_{\text{Reduced NOC}}$  and  $M_{\text{Organonitrates}}$  in Equation S2 are the molecular weights of NOC with reduced N and organonitrates, and are assumed to be 100 and 200, respectively.  $M_{\text{Reduced NOC}}$  is assumed to have a smaller value than  $M_{\text{Organonitrates}}$  to avoid overestimation of NOC with reduced N. Using the estimated concentration of organonitrates according to Equation S1, the estimated concentrations of the NOC with reduced N are calculated and displayed in Fig. S3.

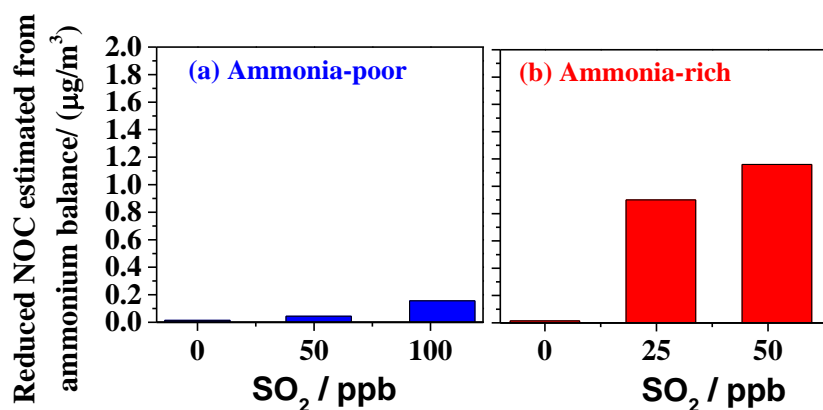

Fig. S3 The estimated concentrations of NOC with reduced N as a function of  $\text{SO}_2$  concentration in photooxidation of toluene/ $\text{NO}_x$  under (a)  $\text{NH}_3$ -poor and (b)

## NH<sub>3</sub>-rich conditions

The uncertainty in the results in Fig. S2 and Fig. S3 might be large, since a lot of parameters are assumed and the measurement response of AMS to the NOC is still highly uncertain. We analyzed the organic fragments containing N in the AMS measurements. Farmer et al. (2010) suggested the estimation of concentrations of organonitrates using the sum of the signals of the five major C<sub>x</sub>H<sub>y</sub>O<sub>z</sub>N<sup>+</sup> fragments in AMS measurement results. However, as pointed out by Farmer et al (2010) and other studies (Galloway et al., 2009;Laskin et al., 2014;Liu et al., 2015), NOC with reduced N could also produce these fragments. In this study, we used Equation S3 to provide an estimate of NOC:

$$c_{NOC} = \frac{CH_4NO^+ + C_2H_5NO^+ + C_3H_4NO^+ + CH_2NO_3^+ + CH_2NO_2^+}{R_{C_xH_yO_zN^+}} \quad (S3)$$

where  $R_{C_xH_yO_zN^+}$  is the fraction of these five major C<sub>x</sub>H<sub>y</sub>O<sub>z</sub>N<sup>+</sup> fragments and accounts for the total oxidized N signal of the organonitrates samples, and was measured as 0.045 in the study of Farmer et al. (2010). The estimated concentrations of NOC using Equation S3 are shown in Fig. S4. These results appear to be comparable to the sum of organonitrates in Fig. S2 and NOC with reduced N in Fig. S3. Meanwhile, the concentrations of C<sub>x</sub>H<sub>y</sub>N<sup>+</sup> fragments are displayed in Fig. S5. They also have similar change trends with SO<sub>2</sub> concentration as the estimated NOC concentrations.

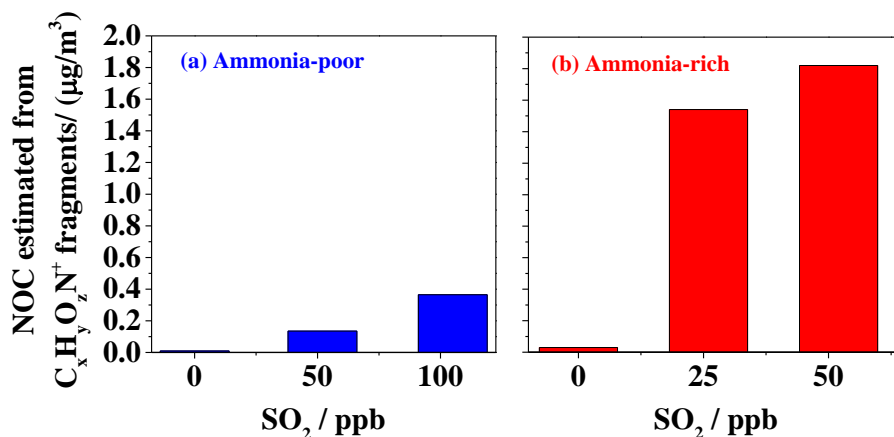

Fig. S4 The estimated concentrations of NOC from C<sub>x</sub>H<sub>y</sub>O<sub>z</sub>N<sup>+</sup> fragments as a function of SO<sub>2</sub> concentration in photooxidation of toluene/NO<sub>x</sub> under (a) NH<sub>3</sub>-poor and (b) NH<sub>3</sub>-rich conditions

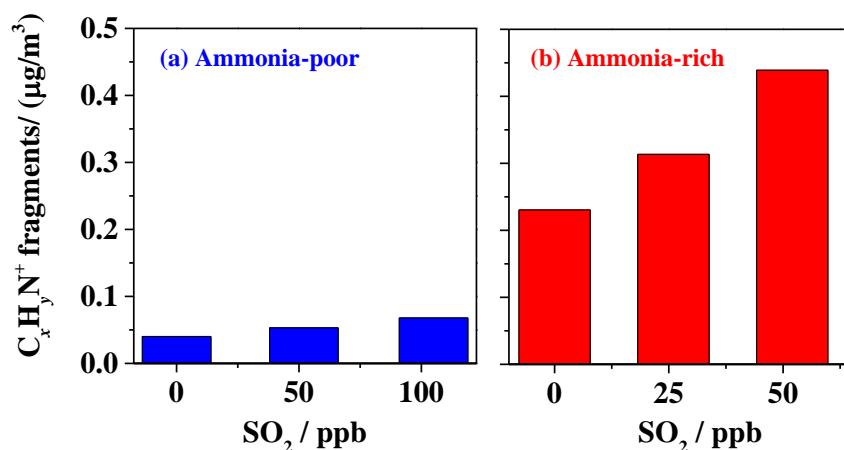

Fig. S5 The concentrations of C<sub>x</sub>H<sub>y</sub>N<sup>+</sup> fragments as a function of SO<sub>2</sub> concentration in photooxidation of toluene/NO<sub>x</sub> under (a) NH<sub>3</sub>-poor and (b) NH<sub>3</sub>-rich conditions

## References

Farmer, D. K., Matsunaga, A., Docherty, K. S., Surratt, J. D., Seinfeld, J. H., Ziemann, P. J., and Jimenez, J. L.: Response of an aerosol mass spectrometer to organonitrates and organosulfates and implications for atmospheric chemistry, Proc. Natl. Acad. Sci. USA, 107, 6670-6675, DOI 10.1073/pnas.0912340107, 2010.

Galloway, M. M., Chhabra, P. S., Chan, A. W. H., Surratt, J. D., Flagan, R. C., Seinfeld, J. H., and Keutsch, F. N.: Glyoxal uptake on ammonium sulphate seed aerosol: reaction products and reversibility of uptake under dark and irradiated conditions, *Atmos. Chem. Phys.*, 9, 3331-3345, 2009.

Jang, M. S., and Kamens, R. M.: Characterization of secondary aerosol from the photooxidation of toluene in the presence of NO<sub>x</sub> and 1-propene, *Environ. Sci. & Technol.*, 35, 3626-3639, DOI 10.1021/es010676+, 2001.

Laskin, J., Laskin, A., Nizkorodov, S. A., Roach, P., Eckert, P., Gilles, M. K., Wang, B. B., Lee, H. J., and Hu, Q. C.: Molecular Selectivity of Brown Carbon Chromophores, *Environ. Sci. & Technol.*, 48, 12047-12055, 2014.

Liu, Y., Liggio, J., Staebler, R., and Li, S. M.: Reactive uptake of ammonia to secondary organic aerosols: kinetics of organonitrogen formation, *Atmos. Chem. Phys.*, 15, 13569-13584, 10.5194/acp-15-13569-2015, 2015.

Wang, X. F., Gao, S., Yang, X., Chen, H., Chen, J. M., Zhuang, G. S., Surratt, J. D., Chan, M. N., and Seinfeld, J. H.: Evidence for High Molecular Weight Nitrogen-Containing Organic Salts in Urban Aerosols, *Environ. Sci. & Technol.*, 44, 4441-4446, DOI 10.1021/es1001117, 2010.
